# Supplementary material for: The use of anticoagulants in the management of atrial fibrillation among general practices in England
Source: HighWire-hosted journal article supplement (doi:10.1136/heartjnl-2012-303472), 2013-02-07
Supplement: heartjnl-2012-303472supp_appendix1.pdf [file heartjnl-2012-303472supp_appendix1.pdf]

## GRASP-AF Read Code List

### Atrial Fibrillation Diagnosis

| Read code | Read term                           |
|-----------|-------------------------------------|
| G573.     | Atrial fibrillation and flutter     |
| G5730     | Atrial fibrillation                 |
| G5731     | Atrial flutter                      |
| G5732     | Paroxysmal atrial fibrillation      |
| G5733     | Non-rheumatic atrial fibrillation   |
| G5734     | Permanent atrial fibrillation       |
| G5735     | Persistent atrial fibrillation      |
| G573z     | Atrial fibrillation and flutter NOS |

### Atrial Fibrillation Resolved

| Read code | Read term                    |
|-----------|------------------------------|
| 212R.     | Atrial fibrillation resolved |

### Congestive Heart Failure

| Read code | Read term                                             |
|-----------|-------------------------------------------------------|
| 662f.     | New York Heart Association classification - class I   |
| 662g.     | New York Heart Association classification - class II  |
| 662h.     | New York Heart Association classification - class III |
| 662i.     | New York Heart Association classification - class IV  |
| G1yz1     | Rheumatic left ventricular failure                    |
| G58..     | Heart failure                                         |
| G580.     | Congestive heart failure                              |
| G5800     | Acute congestive heart failure                        |
| G5801     | Chronic congestive heart failure                      |
| G5802     | Decompensated cardiac failure                         |
| G5803     | Compensated cardiac failure                           |
| G5804     | Congestive heart failure due to valvular disease      |
| G581.     | Left ventricular failure                              |
| G5810     | Acute left ventricular failure                        |
| G582.     | Acute heart failure                                   |
| G583.     | Heart failure with normal ejection fraction           |
| G584.     | Right ventricular failure                             |
| G58z.     | Heart failure NOS                                     |

## Hypertension

| Read code | Read term                                          |
|-----------|----------------------------------------------------|
| G2...     | Hypertensive disease                               |
| G20..     | Essential hypertension                             |
| G200.     | Malignant essential hypertension                   |
| G201.     | Benign essential hypertension                      |
| G202.     | Systolic hypertension                              |
| G203.     | Diastolic hypertension                             |
| G20z.     | Essential hypertension NOS                         |
| G24..     | Secondary hypertension                             |
| G240.     | Secondary malignant hypertension                   |
| G2400     | Secondary malignant renovascular hypertension      |
| G240z     | Secondary malignant hypertension NOS               |
| G241.     | Secondary benign hypertension                      |
| G2410     | Secondary benign renovascular hypertension         |
| G241z     | Secondary benign hypertension NOS                  |
| G244.     | Hypertension secondary to endocrine disorders      |
| G24z.     | Secondary hypertension NOS                         |
| G24z0     | Secondary renovascular hypertension NOS            |
| G24zz     | Secondary hypertension NOS                         |
| G2y..     | Other specified hypertensive disease               |
| G2z..     | Hypertensive disease NOS                           |
| Gyu2.     | [X]Hypertensive diseases                           |
| Gyu20     | [X]Other secondary hypertension                    |
| Gyu21     | [X]Hypertension secondary to other renal disorders |

## Diabetes

| Read code | Read term                                                         |
|-----------|-------------------------------------------------------------------|
| 66A1      | Brittle diabetes                                                  |
| C10..     | Diabetes mellitus                                                 |
| C100.     | Diabetes mellitus with no mention of complication                 |
| C1000     | Diabetes mellitus, juvenile type, with no mention of complication |
| C1001     | Diabetes mellitus, adult onset, with no mention of complication   |
| C100z     | Diabetes mellitus NOS with no mention of complication             |
| C101.     | Diabetes mellitus with ketoacidosis                               |
| C1010     | Diabetes mellitus, juvenile type, with ketoacidosis               |
| C1011     | Diabetes mellitus, adult onset, with ketoacidosis                 |
| C101y     | Other specified diabetes mellitus with ketoacidosis               |
| C101z     | Diabetes mellitus NOS with ketoacidosis                           |
| C102.     | Diabetes mellitus with hyperosmolar coma                          |
| C1020     | Diabetes mellitus, juvenile type, with hyperosmolar coma          |
| C1021     | Diabetes mellitus, adult onset, with hyperosmolar coma            |

| Read code | Read term                                                                   |
|-----------|-----------------------------------------------------------------------------|
| C102z     | Diabetes mellitus NOS with hyperosmolar coma                                |
| C103.     | Diabetes mellitus with ketoacidotic coma                                    |
| C1030     | Diabetes mellitus, juvenile type, with ketoacidotic coma                    |
| C1031     | Diabetes mellitus, adult onset, with ketoacidotic coma                      |
| C103y     | Other specified diabetes mellitus with coma                                 |
| C103z     | Diabetes mellitus NOS with ketoacidotic coma                                |
| C104.     | Diabetes mellitus with renal manifestation                                  |
| C1040     | Diabetes mellitus, juvenile type, with renal manifestation                  |
| C1041     | Diabetes mellitus, adult onset, with renal manifestation                    |
| C104y     | Other specified diabetes mellitus with renal complications                  |
| C104z     | Diabetes mellitus with nephropathy NOS                                      |
| C105.     | Diabetes mellitus with ophthalmic manifestation                             |
| C1050     | Diabetes mellitus, juvenile type, with ophthalmic manifestation             |
| C1051     | Diabetes mellitus, adult onset, with ophthalmic manifestation               |
| C105y     | Other specified diabetes mellitus with ophthalmic complications             |
| C105z     | Diabetes mellitus NOS with ophthalmic manifestation                         |
| C106.     | Diabetes mellitus with neurological manifestation                           |
| C1060     | Diabetes mellitus, juvenile type, with neurological manifestation           |
| C1061     | Diabetes mellitus, adult onset, with neurological manifestation             |
| C106y     | Other specified diabetes mellitus with neurological complications           |
| C106z     | Diabetes mellitus NOS with neurological manifestation                       |
| C107.     | Diabetes mellitus with peripheral circulatory disorder                      |
| C1070     | Diabetes mellitus, juvenile type, with peripheral circulatory disorder      |
| C1071     | Diabetes mellitus, adult onset, with peripheral circulatory disorder        |
| C1072     | Diabetes mellitus, adult with gangrene                                      |
| C1073     | IDDM with peripheral circulatory disorder                                   |
| C1074     | NIDDM with peripheral circulatory disorder                                  |
| C107y     | Other specified diabetes mellitus with peripheral circulatory complications |
| C107z     | Diabetes mellitus NOS with peripheral circulatory disorder                  |
| C108.     | Insulin dependent diabetes mellitus                                         |
| C1080     | Insulin-dependent diabetes mellitus with renal complications                |
| C1081     | Insulin-dependent diabetes mellitus with ophthalmic complications           |
| C1082     | Insulin-dependent diabetes mellitus with neurological complications         |
| C1083     | Insulin dependent diabetes mellitus with multiple complications             |
| C1084     | Unstable insulin dependent diabetes mellitus                                |
| C1085     | Insulin dependent diabetes mellitus with ulcer                              |
| C1086     | Insulin dependent diabetes mellitus with gangrene                           |
| C1087     | Insulin dependent diabetes mellitus with retinopathy                        |
| C1088     | Insulin dependent diabetes mellitus - poor control                          |
| C1089     | Insulin dependent diabetes maturity onset                                   |
| C108A     | Insulin-dependent diabetes without complication                             |
| C108B     | Insulin dependent diabetes mellitus with mononeuropathy                     |
| C108C     | Insulin dependent diabetes mellitus with polyneuropathy                     |

| Read code | Read term                                                                        |
|-----------|----------------------------------------------------------------------------------|
| C108D     | Insulin dependent diabetes mellitus with nephropathy                             |
| C108E     | Insulin dependent diabetes mellitus with hypoglycaemic coma                      |
| C108F     | Insulin dependent diabetes mellitus with diabetic cataract                       |
| C108G     | Insulin dependent diabetes mellitus with peripheral angiopathy                   |
| C108H     | Insulin dependent diabetes mellitus with arthropathy                             |
| C108J     | Insulin dependent diabetes mellitus with neuropathic arthropathy                 |
| C108y     | Other specified diabetes mellitus with multiple complications                    |
| C108z     | Unspecified diabetes mellitus with multiple complications                        |
| C109.     | Non-insulin dependent diabetes mellitus                                          |
| C1090     | Non-insulin-dependent diabetes mellitus with renal complications                 |
| C1091     | Non-insulin-dependent diabetes mellitus with ophthalmic complications            |
| C1092     | Non-insulin-dependent diabetes mellitus with neurological complications          |
| C1093     | Non-insulin-dependent diabetes mellitus with multiple complications              |
| C1094     | Non-insulin dependent diabetes mellitus with ulcer                               |
| C1095     | Non-insulin dependent diabetes mellitus with gangrene                            |
| C1096     | Non-insulin-dependent diabetes mellitus with retinopathy                         |
| C1097     | Non-insulin dependent diabetes mellitus - poor control                           |
| C1099     | Non-insulin-dependent diabetes mellitus without complication                     |
| C109A     | Non-insulin dependent diabetes mellitus with mononeuropathy                      |
| C109B     | Non-insulin dependent diabetes mellitus with polyneuropathy                      |
| C109C     | Non-insulin dependent diabetes mellitus with nephropathy                         |
| C109D     | Non-insulin dependent diabetes mellitus with hypoglycaemic coma                  |
| C109E     | Non-insulin dependent diabetes mellitus with diabetic cataract                   |
| C109F     | Non-insulin-dependent diabetes mellitus with peripheral angiopathy               |
| C109G     | Non-insulin dependent diabetes mellitus with arthropathy                         |
| C109H     | Non-insulin dependent diabetes mellitus with neuropathic arthropathy             |
| C109J     | Insulin treated Type 2 diabetes mellitus                                         |
| C109K     | Hyperosmolar non-ketotic state in type 2 diabetes mellitus                       |
| C10A.     | Malnutrition-related diabetes mellitus                                           |
| C10A0     | Malnutrition-related diabetes mellitus with coma                                 |
| C10A1     | Malnutrition-related diabetes mellitus with ketoacidosis                         |
| C10A2     | Malnutrition-related diabetes mellitus with renal complications                  |
| C10A3     | Malnutrition-related diabetes mellitus with ophthalmic complications             |
| C10A4     | Malnutrition-related diabetes mellitus with neurological complications           |
| C10A5     | Malnutrition-related diabetes mellitus with peripheral circulatory complications |
| C10A6     | Malnutrition-related diabetes mellitus with multiple complications               |
| C10A7     | Malnutrition-related diabetes mellitus without complications                     |
| C10AW     | Malnutrition-related diabetes mellitus with unspecified complications            |
| C10AX     | Malnutrition-related diabetes mellitus with other specified complications        |
| C10B.     | Diabetes mellitus induced by steroids                                            |
| C10B0     | Steroid induced diabetes mellitus without complication                           |
| C10C.     | Diabetes mellitus autosomal dominant                                             |
| C10D.     | Diabetes mellitus autosomal dominant type 2                                      |

| Read code | Read term                                                 |
|-----------|-----------------------------------------------------------|
| C10E.     | Type 1 diabetes mellitus                                  |
| C10E0     | Type 1 diabetes mellitus with renal complications         |
| C10E1     | Type 1 diabetes mellitus with ophthalmic complications    |
| C10E2     | Type 1 diabetes mellitus with neurological complications  |
| C10E3     | Type 1 diabetes mellitus with multiple complications      |
| C10E4     | Unstable type 1 diabetes mellitus                         |
| C10E5     | Type 1 diabetes mellitus with ulcer                       |
| C10E6     | Type 1 diabetes mellitus with gangrene                    |
| C10E7     | Type 1 diabetes mellitus with retinopathy                 |
| C10E8     | Type 1 diabetes mellitus - poor control                   |
| C10E9     | Type 1 diabetes mellitus maturity onset                   |
| C10EA     | Type 1 diabetes mellitus without complication             |
| C10EB     | Type 1 diabetes mellitus with mononeuropathy              |
| C10EC     | Type 1 diabetes mellitus with polyneuropathy              |
| C10ED     | Type 1 diabetes mellitus with nephropathy                 |
| C10EE     | Type 1 diabetes mellitus with hypoglycaemic coma          |
| C10EF     | Type 1 diabetes mellitus with diabetic cataract           |
| C10EG     | Type 1 diabetes mellitus with peripheral angiopathy       |
| C10EH     | Type 1 diabetes mellitus with arthropathy                 |
| C10EJ     | Type 1 diabetes mellitus with neuropathic arthropathy     |
| C10EK     | Type 1 diabetes mellitus with persistent proteinuria      |
| C10EL     | Type 1 diabetes mellitus with persistent microalbuminuria |
| C10EM     | Type 1 diabetes mellitus with ketoacidosis                |
| C10EN     | Type 1 diabetes mellitus with ketoacidotic coma           |
| C10EP     | Type 1 diabetes mellitus with exudative maculopathy       |
| C10EQ     | Type 1 diabetes mellitus with gastroparesis               |
| C10ER     | Latent autoimmune diabetes mellitus in adult              |
| C10F.     | Type 2 diabetes mellitus                                  |
| C10F0     | Type 2 diabetes mellitus with renal complications         |
| C10F1     | Type 2 diabetes mellitus with ophthalmic complications    |
| C10F2     | Type 2 diabetes mellitus with neurological complications  |
| C10F3     | Type 2 diabetes mellitus with multiple complications      |
| C10F4     | Type 2 diabetes mellitus with ulcer                       |
| C10F5     | Type 2 diabetes mellitus with gangrene                    |
| C10F6     | Type 2 diabetes mellitus with retinopathy                 |
| C10F7     | Type 2 diabetes mellitus - poor control                   |
| C10F9     | Type 2 diabetes mellitus without complication             |
| C10FA     | Type 2 diabetes mellitus with mononeuropathy              |
| C10FB     | Type 2 diabetes mellitus with polyneuropathy              |
| C10FC     | Type 2 diabetes mellitus with nephropathy                 |
| C10FD     | Type 2 diabetes mellitus with hypoglycaemic coma          |
| C10FE     | Type 2 diabetes mellitus with diabetic cataract           |
| C10FF     | Type 2 diabetes mellitus with peripheral angiopathy       |

| Read code | Read term                                                            |
|-----------|----------------------------------------------------------------------|
| C10FG     | Type 2 diabetes mellitus with arthropathy                            |
| C10FH     | Type 2 diabetes mellitus with neuropathic arthropathy                |
| C10FJ     | Insulin treated Type 2 diabetes mellitus                             |
| C10FK     | Hyperosmolar non-ketotic state in type 2 diabetes mellitus           |
| C10FL     | Type 2 diabetes mellitus with persistent proteinuria                 |
| C10FM     | Type 2 diabetes mellitus with persistent microalbuminuria            |
| C10FN     | Type 2 diabetes mellitus with ketoacidosis                           |
| C10FP     | Type 2 diabetes mellitus with ketoacidotic coma                      |
| C10FQ     | Type 2 diabetes mellitus with exudative maculopathy                  |
| C10FR     | Type 2 diabetes mellitus with gastroparesis                          |
| C10FS     | Maternally inherited diabetes mellitus                               |
| C10G.     | Secondary pancreatic diabetes mellitus                               |
| C10G0     | Secondary pancreatic diabetes mellitus without complication          |
| C10H.     | Diabetes mellitus induced by non-steroid drugs                       |
| C10H0     | Diabetes mellitus induced by non-steroid drugs without complication  |
| C10L.     | Fibrocalculous pancreatopathy                                        |
| C10L0     | Fibrocalculous pancreatopathy without complication                   |
| C10M.     | Lipoatrophic diabetes mellitus                                       |
| C10M0     | Lipoatrophic diabetes mellitus without complication                  |
| C10N.     | Secondary diabetes mellitus                                          |
| C10N0     | Secondary diabetes mellitus without complication                     |
| C10N1     | Cystic fibrosis related diabetes mellitus                            |
| C10y.     | Diabetes mellitus with other specified manifestation                 |
| C10y0     | Diabetes mellitus, juvenile type, with other specified manifestation |
| C10y1     | Diabetes mellitus, adult onset, with other specified manifestation   |
| C10yy     | Other specified diabetes mellitus with other specified complications |
| C10yz     | Diabetes mellitus NOS with other specified manifestation             |
| C10z.     | Diabetes mellitus with unspecified complication                      |
| C10z0     | Diabetes mellitus, juvenile type, with unspecified complication      |
| C10z1     | Diabetes mellitus, adult onset, with unspecified complication        |
| C10zy     | Other specified diabetes mellitus with unspecified complications     |
| C10zz     | Diabetes mellitus NOS with unspecified complication                  |

### History of Stroke or TIA

| Read code | Read term                    |
|-----------|------------------------------|
| F4236     | Amaurosis fugax              |
| G61..     | Intracerebral haemorrhage    |
| G610.     | Cortical haemorrhage         |
| G611.     | Internal capsule haemorrhage |
| G612.     | Basal nucleus haemorrhage    |
| G613.     | Cerebellar haemorrhage       |
| G614.     | Pontine haemorrhage          |

|       |                                                             |
|-------|-------------------------------------------------------------|
| G615. | Bulbar haemorrhage                                          |
| G616. | External capsule haemorrhage                                |
| G618. | Intracerebral haemorrhage, multiple localized               |
| G61X. | Intracerebral haemorrhage in hemisphere, unspecified        |
| G61X0 | Left sided intracerebral haemorrhage, unspecified           |
| G61X1 | Right sided intracerebral haemorrhage, unspecified          |
| G61z. | Intracerebral haemorrhage NOS                               |
| G63.. | Precerebral arterial occlusion                              |
| G63y0 | Cerebral infarct due to thrombosis of precerebral arteries  |
| G63y1 | Cerebral infarction due to embolism of precerebral arteries |
| G64.. | Cerebral arterial occlusion                                 |
| G640. | Cerebral thrombosis                                         |
| G6400 | Cerebral infarction due to thrombosis of cerebral arteries  |
| G641. | Cerebral embolism                                           |
| G6410 | Cerebral infarction due to embolism of cerebral arteries    |
| G64z. | Cerebral infarction NOS                                     |
| G64z0 | Brainstem infarction                                        |
| G64z1 | Wallenberg syndrome                                         |
| G64z2 | Left sided cerebral infarction                              |
| G64z3 | Right sided cerebral infarction                             |
| G64z4 | Infarction of basal ganglia                                 |
| G65.. | Transient cerebral ischaemia                                |
| G650. | Basilar artery syndrome                                     |
| G651. | Vertebral artery syndrome                                   |
| G6510 | Vertebro-basilar artery syndrome                            |
| G652. | Subclavian steal syndrome                                   |
| G653. | Carotid artery syndrome hemispheric                         |
| G654. | Multiple and bilateral precerebral artery syndromes         |
| G656. | Vertebrobasilar insufficiency                               |
| G65y. | Other transient cerebral ischaemia                          |
| G65z. | Transient cerebral ischaemia NOS                            |
| G65z0 | Impending cerebral ischaemia                                |
| G65z1 | Intermittent cerebral ischaemia                             |
| G65zz | Transient cerebral ischaemia NOS                            |
| G66.. | Stroke and cerebrovascular accident unspecified             |
| G660. | Middle cerebral artery syndrome                             |
| G661. | Anterior cerebral artery syndrome                           |
| G662. | Posterior cerebral artery syndrome                          |
| G663. | Brain stem stroke syndrome                                  |
| G664. | Cerebellar stroke syndrome                                  |
| G665. | Pure motor lacunar syndrome                                 |
| G666. | Pure sensory lacunar syndrome                               |
| G667. | Left sided CVA                                              |
| G668. | Right sided CVA                                             |

|       |                                                                                         |
|-------|-----------------------------------------------------------------------------------------|
| G669. | Cerebral palsy, not congenital or infantile, acute                                      |
| G6760 | Cerebral infarction due to cerebral venous thrombosis, nonpyogenic                      |
| G683. | Sequelae of cerebral infarction                                                         |
| G6W.. | Cerebral infarction due to unspecified occlusion or stenosis of precerebral arteries    |
| G6X.. | Cerebral infarction due to unspecified occlusion or stenosis of cerebral arteries       |
| Gyu62 | [X]Other intracerebral haemorrhage                                                      |
| Gyu63 | [X]Cerebral infarction due to unspecified occlusion or stenosis of cerebral arteries    |
| Gyu64 | [X]Other cerebral infarction                                                            |
| Gyu65 | [X]Occlusion and stenosis of other precerebral arteries                                 |
| Gyu66 | [X]Occlusion and stenosis of other cerebral arteries                                    |
| Gyu6F | [X]Intracerebral haemorrhage in hemisphere, unspecified                                 |
| Gyu6G | [X]Cerebral infarction due to unspecified occlusion or stenosis of precerebral arteries |
| ZV12D | [V]Personal history of transient ischaemic attack                                       |



## Anticoagulant Therapy

| Read code | Read term                               |
|-----------|-----------------------------------------|
| 8B2K.     | Anticoagulant prescribed by third party |
| bs...     | ORAL ANTICOAGULANTS                     |
| bs1..     | WARFARIN SODIUM                         |
| bs11.     | MAREVAN 1mg tablets                     |
| bs12.     | MAREVAN 3mg tablets                     |
| bs13.     | MAREVAN 5mg tablets                     |
| bs14.     | *WARFARIN WBP 1mg tablets               |
| bs15.     | *WARFARIN WBP 3mg tablets               |
| bs16.     | *WARFARIN WBP 5mg tablets               |
| bs17.     | WARFARIN SODIUM 1mg tablets             |
| bs18.     | WARFARIN SODIUM 3mg tablets             |
| bs19.     | WARFARIN SODIUM 5mg tablets             |
| bs1A.     | WARFARIN SODIUM 0.5mg tablets           |
| bs1B.     | MAREVAN 0.5mg tablets                   |
| bs1C.     | WARFARIN SODIUM 1mg/1mL oral suspension |
| bs2..     | ACENOCOUMAROL                           |
| bs21.     | SINTHROME 1mg tablets                   |
| bs22.     | *SINTHROME 4mg tablets                  |
| bs23.     | ACENOCOUMAROL 1mg tablets               |
| bs24.     | *NICOUMALONE 4mg tablets                |
| bs3..     | PHENINDIONE                             |
| bs31.     | *DINDEVAN 10mg tablets                  |
| bs32.     | *DINDEVAN 25mg tablets                  |
| bs33.     | *DINDEVAN 50mg tablets                  |
| bs34.     | PHENINDIONE 10mg tablets                |
| bs35.     | PHENINDIONE 25mg tablets                |
| bs36.     | PHENINDIONE 50mg tablets                |
| bs4..     | DABIGATRAN ETEXILATE                    |
| bs41.     | PRADAXA 75mg capsules                   |
| bs42.     | PRADAXA 110mg capsules                  |
| bs43.     | PRADAXA 150mg capsules                  |
| bs4x.     | DABIGATRAN ETEXILATE 150mg capsules     |
| bs4y.     | DABIGATRAN ETEXILATE 110mg capsules     |
| bs4z.     | DABIGATRAN ETEXILATE 75mg capsules      |
| bs5..     | *DICOUMAROL [NO DRUGS HERE]             |
| bs6..     | RIVAROXABAN                             |
| bs61.     | XARELTO 10mg tablets                    |
| bs62.     | XARELTO 15mg tablets                    |
| bs63.     | XARELTO 20mg tablets                    |
| bs6x.     | RIVAROXABAN 20mg tablets                |
| bs6y.     | RIVAROXABAN 15mg tablets                |
| bs6z.     | RIVAROXABAN 10mg tablets                |

| Read code | Read term              |
|-----------|------------------------|
| bs7..     | APIXABAN               |
| bs71.     | ELIQUIS 2.5mg tablets  |
| bs72.     | APIXABAN 2.5mg tablets |

### Anticoagulant Contraindicated

| Read code | Read term                                                    |
|-----------|--------------------------------------------------------------|
| 14LP.     | H/O: warfarin allergy                                        |
| 8I25.     | Warfarin contraindicated                                     |
| 8I2R.     | Anticoagulation contraindicated                              |
| 8I2o.     | Dabigatran contraindicated                                   |
| 8I71.     | Warfarin not tolerated                                       |
| 8I7A.     | Anticoagulation not tolerated                                |
| 8I7R.     | Dabigatran not tolerated                                     |
| TJ42.     | Adverse reaction to anticoagulants                           |
| TJ421     | Adverse reaction to warfarin sodium                          |
| TJ422     | Adverse reaction to nicoumalone                              |
| TJ423     | Adverse reaction to phenindione                              |
| TJ42z     | Adverse reaction to anticoagulants NOS                       |
| U6042     | [X]Anticoagulants causing adverse effects in therapeutic use |
| ZV14A     | [V]Personal history of warfarin allergy                      |

### Anticoagulant Declined

| Read code | Read term                |
|-----------|--------------------------|
| 8I3E.     | Warfarin declined        |
| 8I3d.     | Anticoagulation declined |
| 8IES.     | Dabigatran declined      |

## Antiplatelet Therapy

| Read code | Read term                                             |
|-----------|-------------------------------------------------------|
| 6718.     | Advice about taking aspirin                           |
| 8B3T.     | Over the counter aspirin therapy                      |
| 8B63.     | Salicylate prophylaxis                                |
| 8B6C.     | Anti-platelet prophylaxis                             |
| 8B6P.     | Clopidogrel prophylaxis                               |
| 8B6W.     | Dipyridamole prophylaxis                              |
| blm..     | ISOSORBIDE MONONITRATE+ASPIRIN                        |
| blm1.     | IMAZIN XL 60mg/75mg m/r tablets                       |
| blm2.     | IMAZIN XL FORTE 60mg/150mg m/r tablets                |
| blmy.     | ISOSORBIDE MONONITRATE+ASPIRIN 60mg/150mg m/r tablets |
| blmz.     | ISOSORBIDE MONONITRATE+ASPIRIN 60mg/75mg m/r tablets  |
| bu1..     | DIPYRIDAMOLE                                          |
| bu11.     | *PERSANTIN 25mg tablets                               |
| bu12.     | PERSANTIN 100mg tablets                               |
| bu14.     | DIPYRIDAMOLE 25mg tablets                             |
| bu15.     | DIPYRIDAMOLE 100mg tablets                            |
| bu16.     | *VASYROL 25mg tablets                                 |
| bu17.     | *VASYROL 100mg tablets                                |
| bu18.     | *CEREBROVASE 25mg tablets                             |
| bu19.     | *CEREBROVASE 100mg tablets                            |
| bu1A.     | *MODAPLATE 100mg tablets                              |
| bu1B.     | *MODAPLATE 25mg tablets                               |
| bu1C.     | DIPYRIDAMOLE 200mg m/r capsules                       |
| bu1D.     | PERSANTIN RETARD 200mg m/r capsules                   |
| bu1E.     | DIPYRIDAMOLE 50mg/5mL oral suspension                 |
| bu2..     | ASPIRIN [ANTIPLATELET]                                |
| bu21.     | *ASPIRIN 100mg effervescent tablets                   |
| bu22.     | *PLATET 100mg effervescent tablets                    |
| bu23.     | ASPIRIN 75mg dispersible tablets                      |
| bu24.     | *ANGETTES 75mg tablets                                |
| bu25.     | *ASPIRIN 75mg tablets                                 |
| bu26.     | *PLATET 300mg effervescent tablets                    |
| bu27.     | *ASPIRIN 300mg effervescent tablets                   |
| bu28.     | *DISPRIN CV 100mg m/r tablets                         |
| bu29.     | *ASPIRIN 100mg m/r tablets                            |
| bu2A.     | NU-SEALS ASPIRIN 75mg e/c tablets                     |
| bu2B.     | ASPIRIN 75mg e/c tablets                              |
| bu2C.     | *POSTMI 300mg e/c tablets                             |
| bu2D.     | *POSTMI 75mg dispersible tablets                      |
| bu2E.     | *POSTMI 75mg e/c tablets                              |
| bu2F.     | CAPRIN 75mg e/c tablets                               |
| bu2G.     | *NU-SEALS CARDIO 75 e/c tablets                       |

| Read code | Read term                                    |
|-----------|----------------------------------------------|
| bu2H.     | *ENPRIN 75mg e/c tablets                     |
| bu2I.     | ASPIRIN 162.5mg m/r capsules                 |
| bu2J.     | CASPAC XL 162.5mg m/r capsules               |
| bu2K.     | MICROPIRIN 75mg e/c tablets                  |
| bu2a.     | *DISPRIN CV 300mg m/r tablets                |
| bu2b.     | *ASPIRIN 300mg m/r tablets                   |
| bu2c.     | ASPIRIN 75mg soluble tablets                 |
| bu2d.     | FLAMASACARD 162.5mg m/r capsules             |
| bu4..     | DIPYRIDAMOLE+ASPIRIN                         |
| bu41.     | DIPYRIDAMOLE+ASPIRIN 200mg/25mg m/r capsules |
| bu42.     | ASASANTIN RETARD m/r capsules                |
| bu5..     | CLOPIDOGREL                                  |
| bu51.     | CLOPIDOGREL 75mg tablets                     |
| bu52.     | PLAVIX 75mg tablets                          |
| bu53.     | PLAVIX 300mg tablets                         |
| bu54.     | CLOPIDOGREL 300mg tablets                    |
| bu55.     | GREPID 75mg tablets                          |
| di1..     | ASPIRIN [CENTRAL NERVOUS SYSTEM USE]         |
| di11.     | ASPIRIN [CNS] 300mg tablets                  |
| di12.     | ASPIRIN [CNS] 300mg dispersible tablets      |
| di13.     | *ASPIRIN 75mg dispersible tablets            |
| di14.     | *ASPERGUM 227mg chewing gum                  |
| di15.     | *CLARADIN 300mg tablets                      |
| di16.     | *LABOPRIN 300mg tablets                      |
| di17.     | *PAYNOCIL 600mg tablets                      |
| di18.     | *SOLPRIN 300mg dispersible tablets           |
| di19.     | *ASPIRIN 500mg m/r tablets                   |
| di1a.     | *CAPRIN 324mg e/c tablets                    |
| di1b.     | *LEVIUS 500mg m/r tablets                    |
| di1c.     | NU-SEALS ASPIRIN 300mg e/c tablets           |
| di1d.     | *NU-SEALS ASPIRIN 600mg e/c tablets          |
| di1e.     | *PALAPRIN FORTE 600mg tablets                |
| di1f.     | ASPIRIN 300mg e/c tablets                    |
| di1g.     | *ASPIRIN 600mg e/c tablets                   |
| di1h.     | *ASPIRIN 324mg e/c tablets                   |
| di1i.     | *ASPIRIN 600mg tablets                       |
| di1j.     | *LABOPRIN DL 900mg sachets                   |
| di1k.     | CAPRIN 300mg e/c tablets                     |
| di1m.     | ASPIRIN 300mg soluble tablets                |
| di1n.     | ASPIRIN 300mg suppositories                  |
| di1o.     | ASPIRIN 150mg suppositories                  |
| di1r.     | DISPRIN 300mg dispersible tablets            |
| j11..     | ASPIRIN [MUSCULOSKELETAL USE]                |

| Read code | Read term                         |
|-----------|-----------------------------------|
| j111.     | ASPIRIN 300mg tablets             |
| j112.     | ASPIRIN 300mg dispersible tablets |

### Antiplatelet Contraindicated

| Read code | Read term                                                                                            |
|-----------|------------------------------------------------------------------------------------------------------|
| 14LK.     | H/O: aspirin allergy                                                                                 |
| 14LQ.     | H/O: clopidogrel allergy                                                                             |
| 14LX.     | H/O: dipyridamole allergy                                                                            |
| 8124.     | Aspirin prophylaxis contra-indicated                                                                 |
| 812K.     | Clopidogrel contraindicated                                                                          |
| 812b.     | Dipyridamole contraindicated                                                                         |
| 8170.     | Aspirin not tolerated                                                                                |
| 8172.     | Clopidogrel not tolerated                                                                            |
| 817J.     | Dipyridamole not tolerated                                                                           |
| TJ53.     | Adverse reaction to salicylates                                                                      |
| TJC44     | Adverse reaction to dipyridamole                                                                     |
| U6044     | [X]Antithrombotic drugs [platelet-aggregation inhibitors] causing adverse effects in therapeutic use |
| U6051     | [X]Salicylates causing adverse effects in therapeutic use                                            |
| ZV148     | [V]Personal history of aspirin allergy                                                               |

### Antiplatelet Declined

| Read code | Read term                   |
|-----------|-----------------------------|
| 8138.     | Aspirin prophylaxis refused |
| 813R.     | Clopidogrel declined        |
| 813n.     | Dipyridamole declined       |
