# Supplementary material for: The use of anticoagulants in the management of atrial fibrillation among general practices in England
Source: HighWire-hosted journal article supplement (doi:10.1136/heartjnl-2012-303472), 2013-02-07
Supplement: heartjnl-2012-303472supp_appendix2.pdf [file heartjnl-2012-303472supp_appendix2.pdf]

## Audit of Atrial Fibrillation and CHADS2 Scores

Please click on the Web Upload icon to send in your data

[Classic View](#)

**Select Risk Score** CHADS2

Practice:

**Total Practice Population 10924**

|                              | Total | Percent |
|------------------------------|-------|---------|
| No. with Atrial Fibrillation | 225   | 2.06    |
| Age >= 65 yrs with AF        | 193   | 8.54    |

*NB: Handling of anticoagulant exclusions*

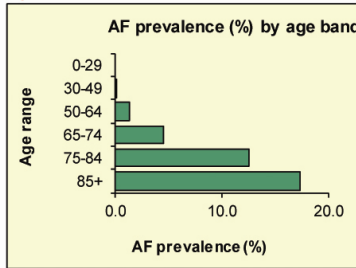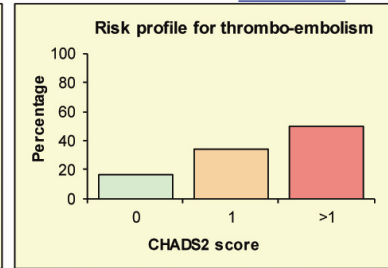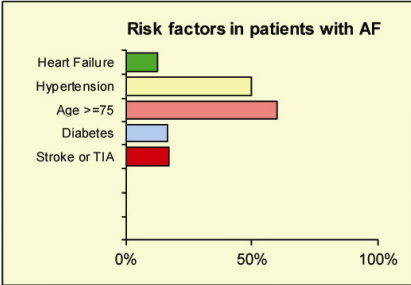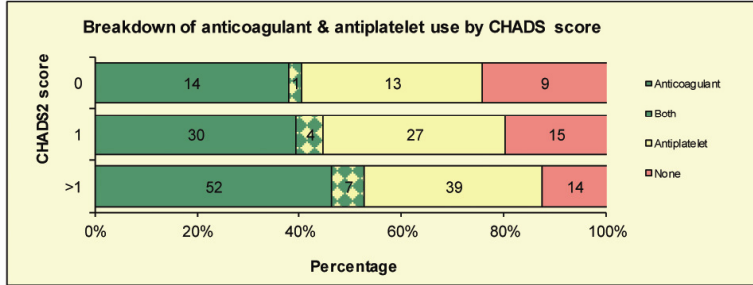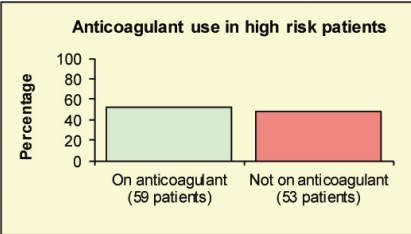

**Strokes expected annually in the 53 high risk untreated**

**3.2**

(95% CI 2.4 to 4.2)

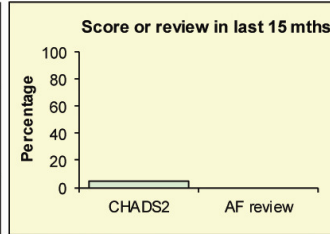

[HELP](#)  
[OVERVIEW](#)  
[PODCAST](#)

©PRIMIS 2011

This dashboard was developed by PRIMIS for use with CHART
